# Supplementary material for: Amyloid-like fibrils formed from intrinsically disordered caseins: physicochemical and nanomechanical properties
Source: Royal Society of Chemistry journal article supplement (doi:10.1039/c5sm01037c), 2015-01-01
Supplement: c5sm01037c1.pdf [file c5sm01037c1.pdf]

## Amyloid-like fibrils formed from intrinsically disordered casein proteins: physicochemical and nanomechanical properties

Kang Pan and Qixin Zhong\*

Department of Food Science and Technology, University of Tennessee in Knoxville, USA

### Supplementary information

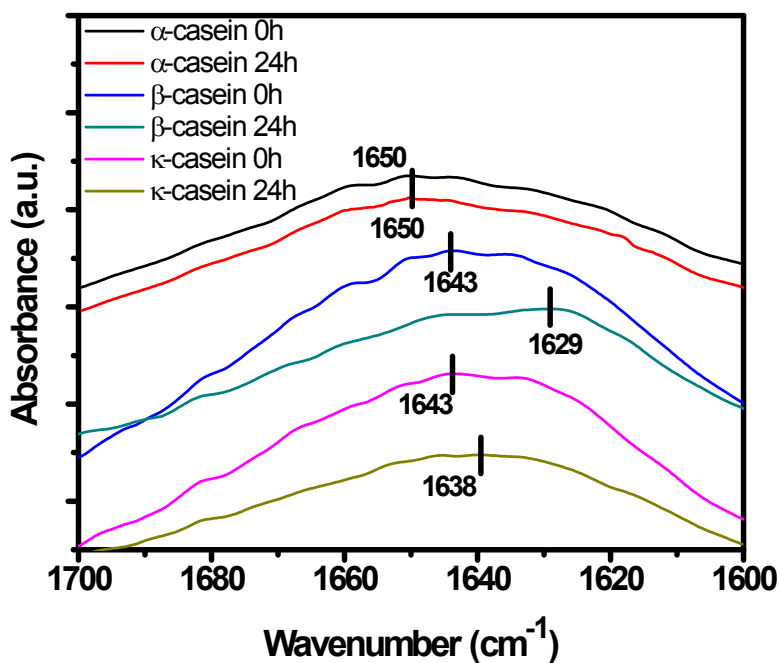

Figure S1. FTIR spectra of  $\alpha$ -,  $\beta$ -, and  $\kappa$ -casein before (0 h) and after (24 h) fibrillation by heating at 90 °C and pH 2.0 for 24 h. The curves were shifted vertically for visualization.
